# Supplementary material for: Cost-effectiveness analysis of intravascular ultrasound-guided peripheral vascular interventions in patients with femoropopliteal peripheral artery disease
Source: Atypon-hosted journal article supplement (doi:10.1024/0301-1526/a001109), 2023-12-18
Supplement: 0301-1526_a001109_esm1.pdf [file 0301-1526_a001109_esm1.pdf]

Electronic supplementary material

**Supplementary Table 1.** Number of events in base-case analysis

|                            | One year horizon |                    | Lifetime horizon |                    |
|----------------------------|------------------|--------------------|------------------|--------------------|
|                            | IVUS-guided      | Angiography-guided | IVUS-guided      | Angiography-guided |
| <b>TLR</b>                 | 158              | 176                | 385              | 649                |
| <b>Absolute difference</b> | -18              | -                  | -264             | -                  |
| <b>Amputations</b>         | 26               | 27                 | 128              | 88                 |
| <b>Absolute difference</b> | -1               | -                  | 40               |                    |

Notes. IVUS: intravascular ultrasound; TLR: target lesion revascularization.
